# Supplementary material for: Efficient bioconjugation of 5-fluoro-5-deoxy-ribose (FDR) to RGD peptides for positron emission tomography (PET) imaging of αvβ3 integrin receptor
Source: Royal Society of Chemistry journal article supplement (doi:10.1039/c3ob40550h), 2013-01-01

## Supporting Information

### Efficient Bioconjugation of 5-Fluoro-5-Deoxy-Ribose (FDR) to RGD Peptides for Positron Emission Tomography (PET) Imaging of $\alpha_v\beta_3$ Integrin Receptor

Sergio Dall'Angelo,<sup>a</sup> Qingzhi Zhang,<sup>b</sup> Ian Fleming,<sup>c</sup> Monica Piras,<sup>a</sup> Lutz F. Schweiger,<sup>a</sup> David O'Hagan,<sup>b,\*</sup> Matteo Zanda<sup>a,\*</sup>

<sup>1</sup>John Mallard Scottish PET Centre, School of Medical Sciences, University of Aberdeen, Foresterhill, Aberdeen, AB25 2ZD.

<sup>2</sup>EastChem School of Chemistry and biological Sciences research Complex, University of St Andrews, North Haugh, St Andrews, KY16 9ST, UK.

<sup>3</sup>Aberdeen Biomedical Imaging Centre, Lilian Sutton Building, Foresterhill, Aberdeen AB25 2ZD, UK

**Figure S1** <sup>1</sup>H NMR of (cRGDfC)-Ahm in D<sub>2</sub>O with solvent suppression

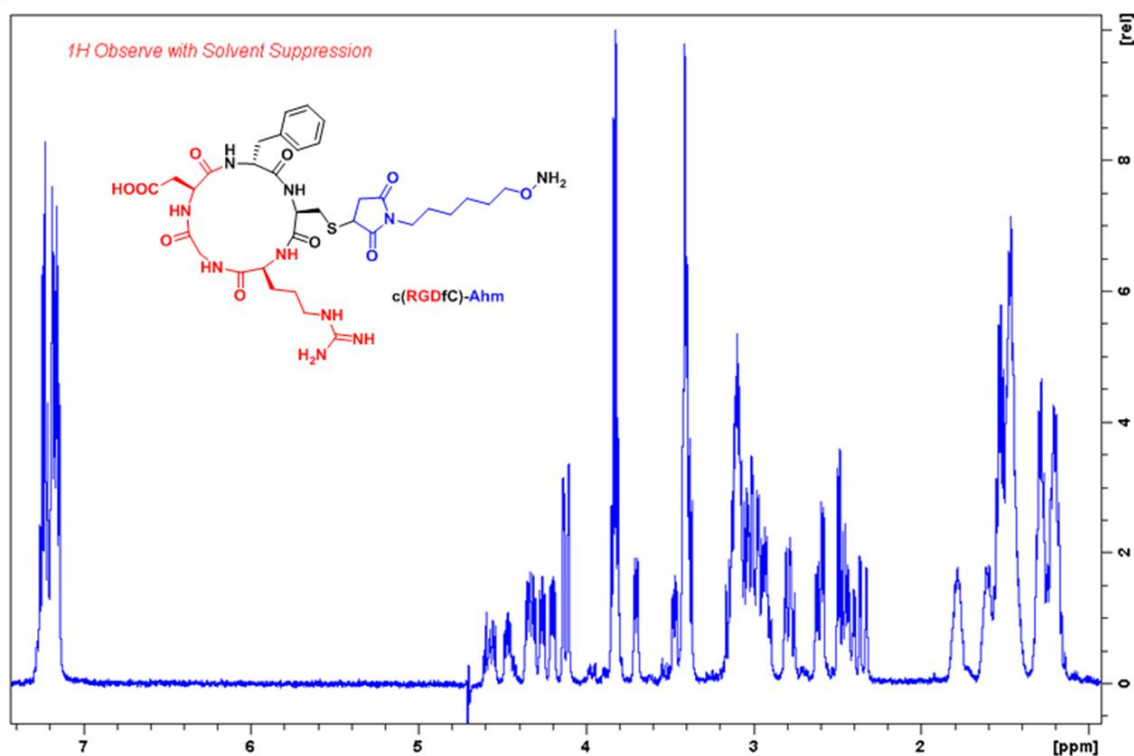

Figure S2 2D TOCSY spectrum of (cRGDFc)-Ahm in D<sub>2</sub>O

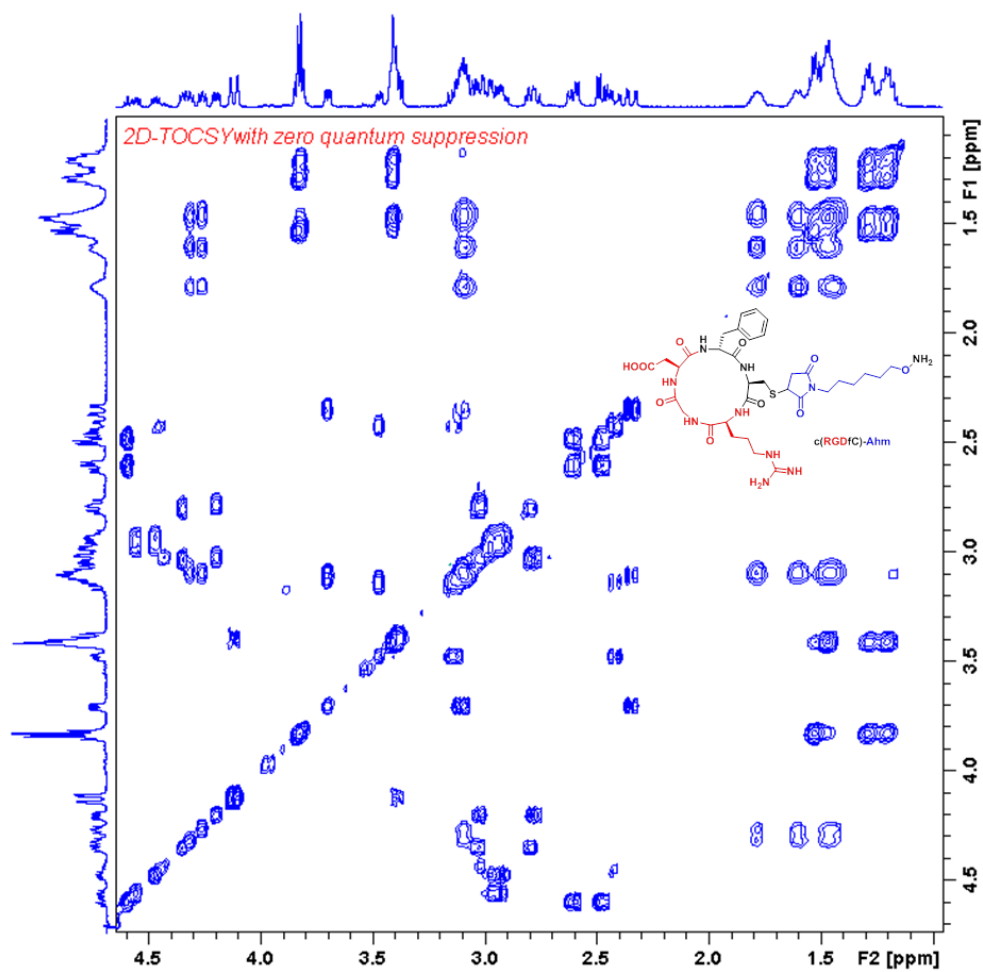

**Figure S3**  $^1\text{H}$ - $^{13}\text{C}$  2D-HSQC spectrum of c(RGDfC)-Ahm in  $\text{D}_2\text{O}$  (20-130ppm)

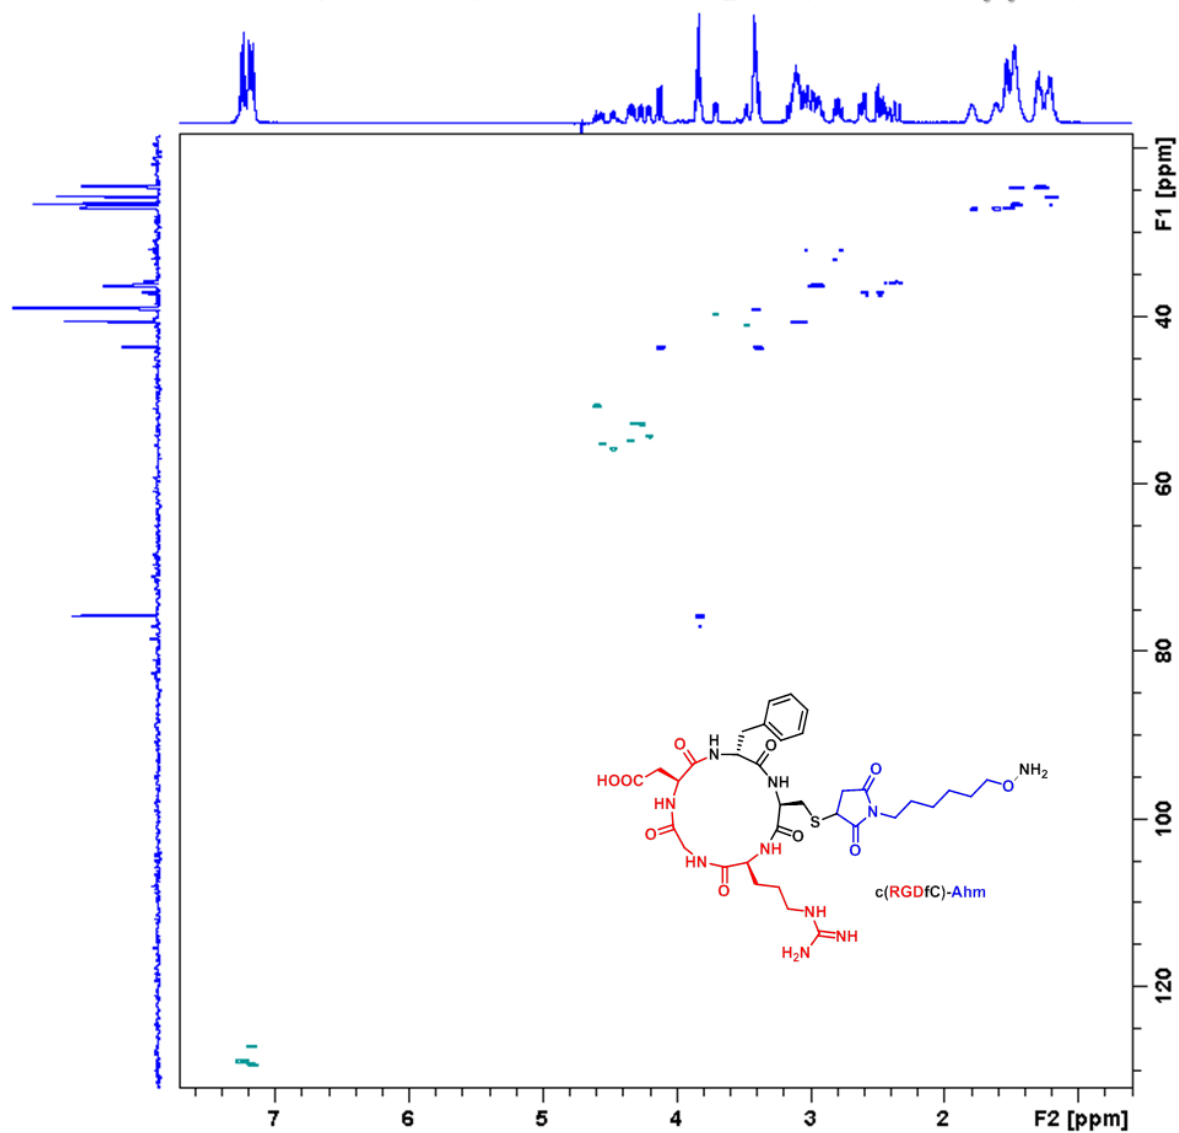

Figure S4  $^1\text{H}$ - $^{13}\text{C}$  2D-HMBC spectrum of c(RGDfC)-Ahm in  $\text{D}_2\text{O}$

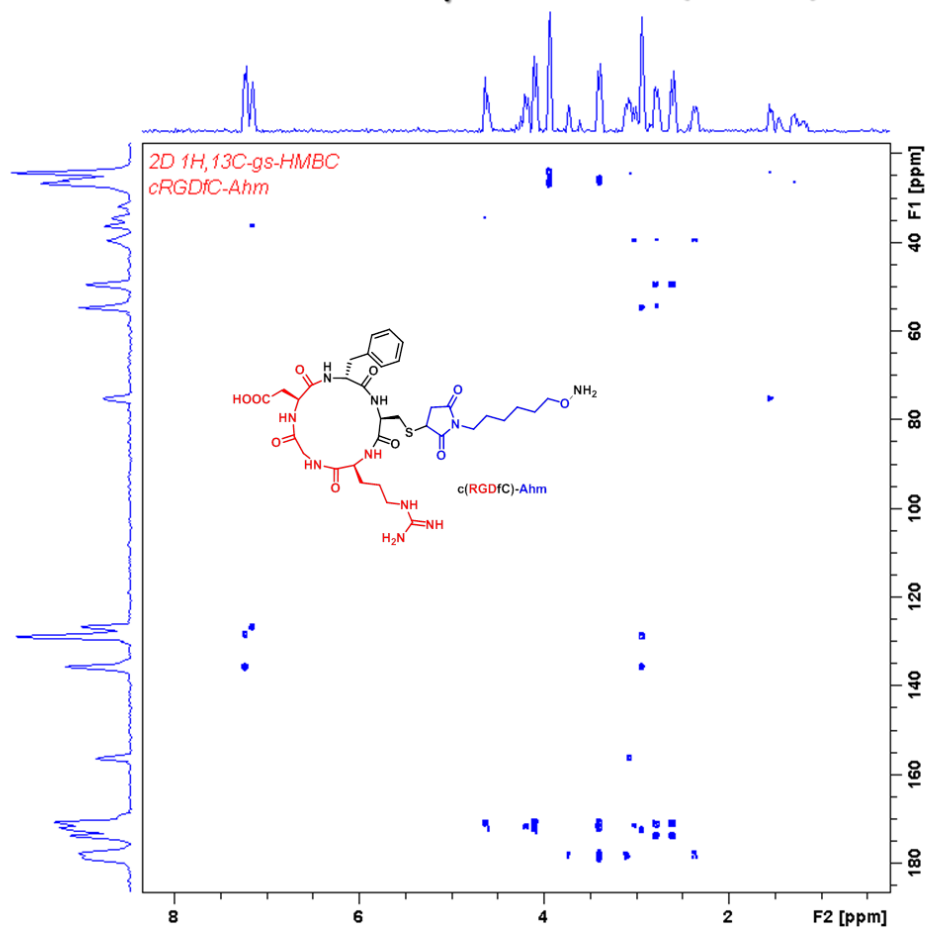

Figure S5  $^1\text{H}$  NMR of (cRGDfC)-Ahm-FDR in  $\text{D}_2\text{O}$  with solvent suppression

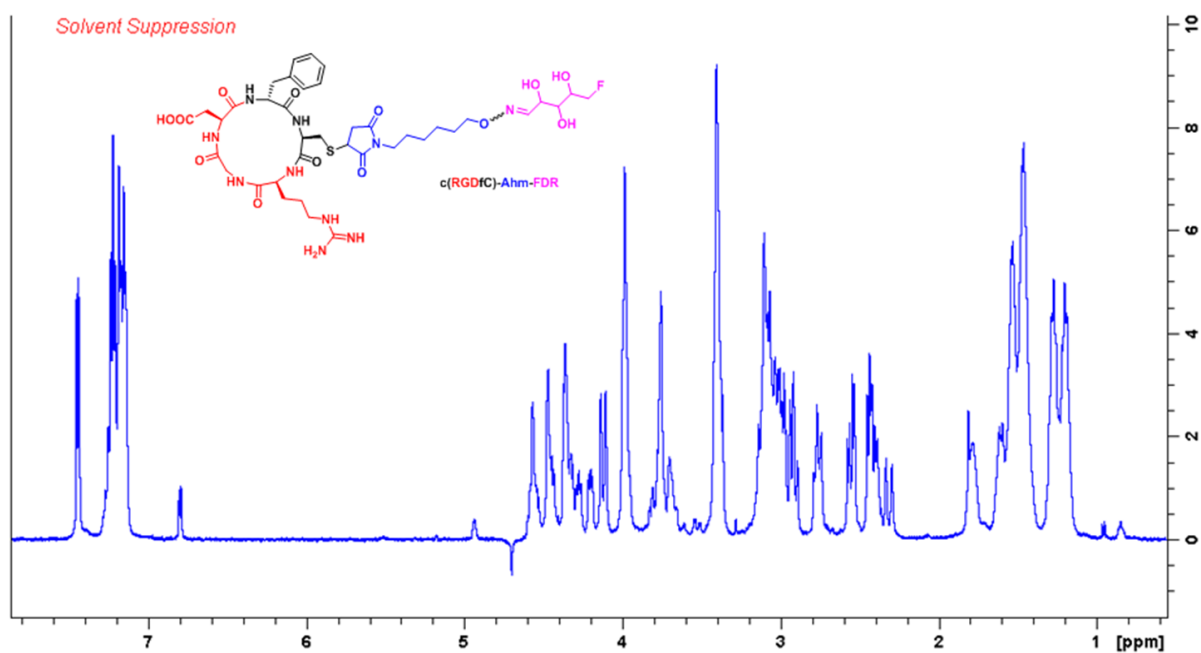

Figure S6 2D TOCSY spectrum of (cRGDfC)-Ahm-FDR in D<sub>2</sub>O

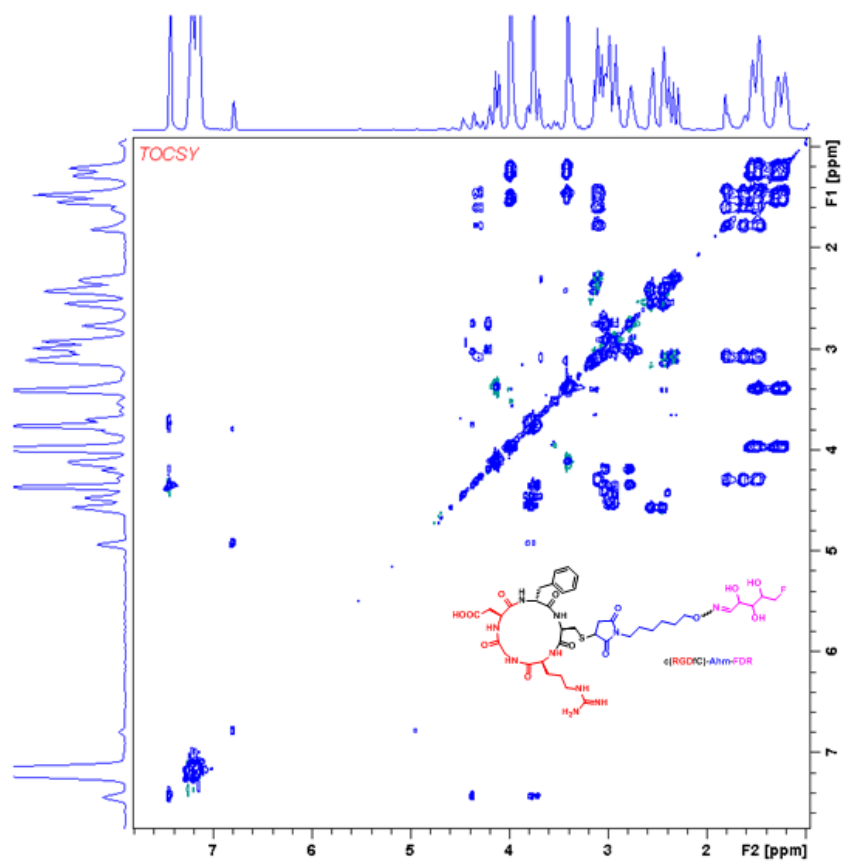

Figure S7  $^1\text{H}$ - $^{13}\text{C}$  2D-HSQC spectrum of c(RGDfC)-Ahm-FDR in  $\text{D}_2\text{O}$

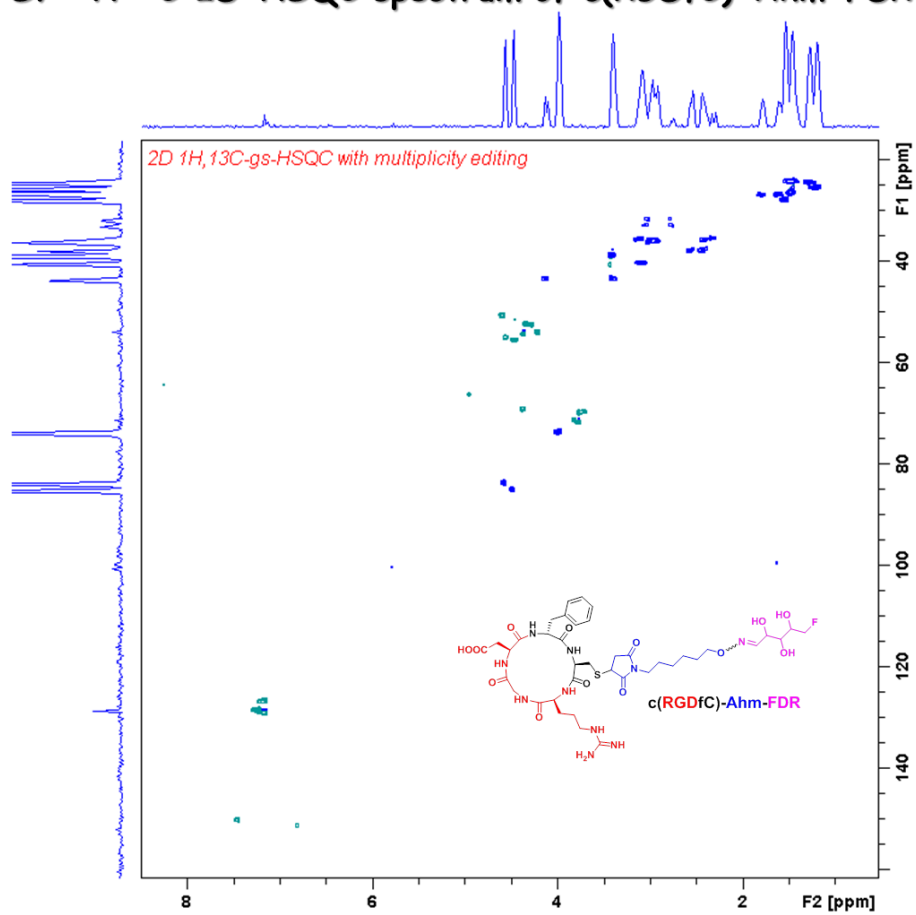

Figure S8  $^1\text{H}$ - $^{13}\text{C}$  2D-HMBC spectrum of c(RGDfC)-Ahm-FDR in  $\text{D}_2\text{O}$

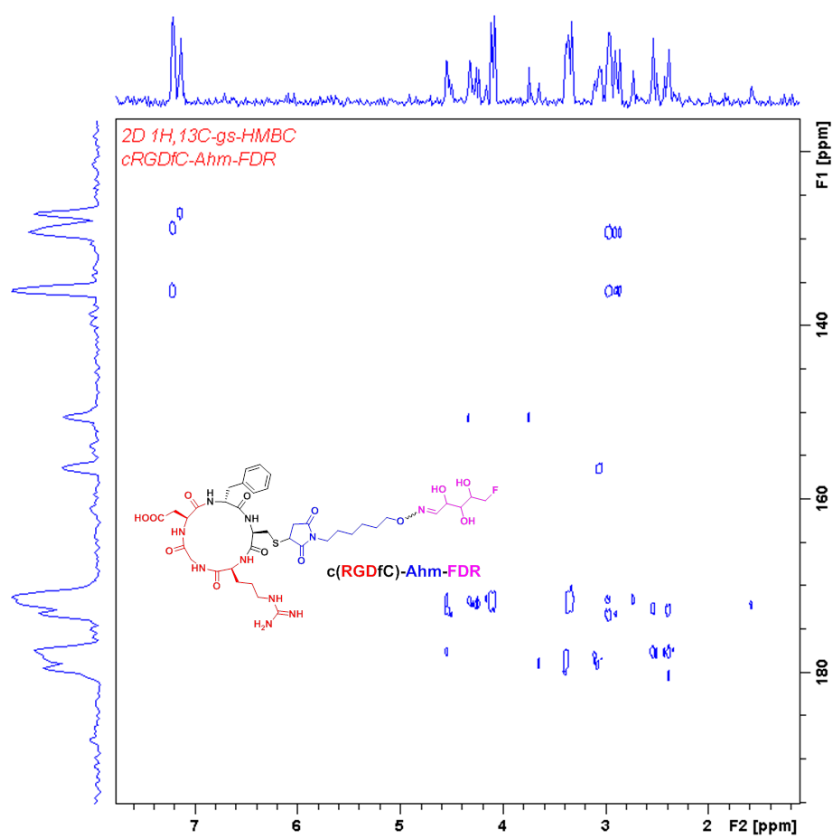

Figure S9  $^{19}\text{F}$  NMR spectrum of c(RGDfC)-Ahm-FDR in  $\text{D}_2\text{O}$

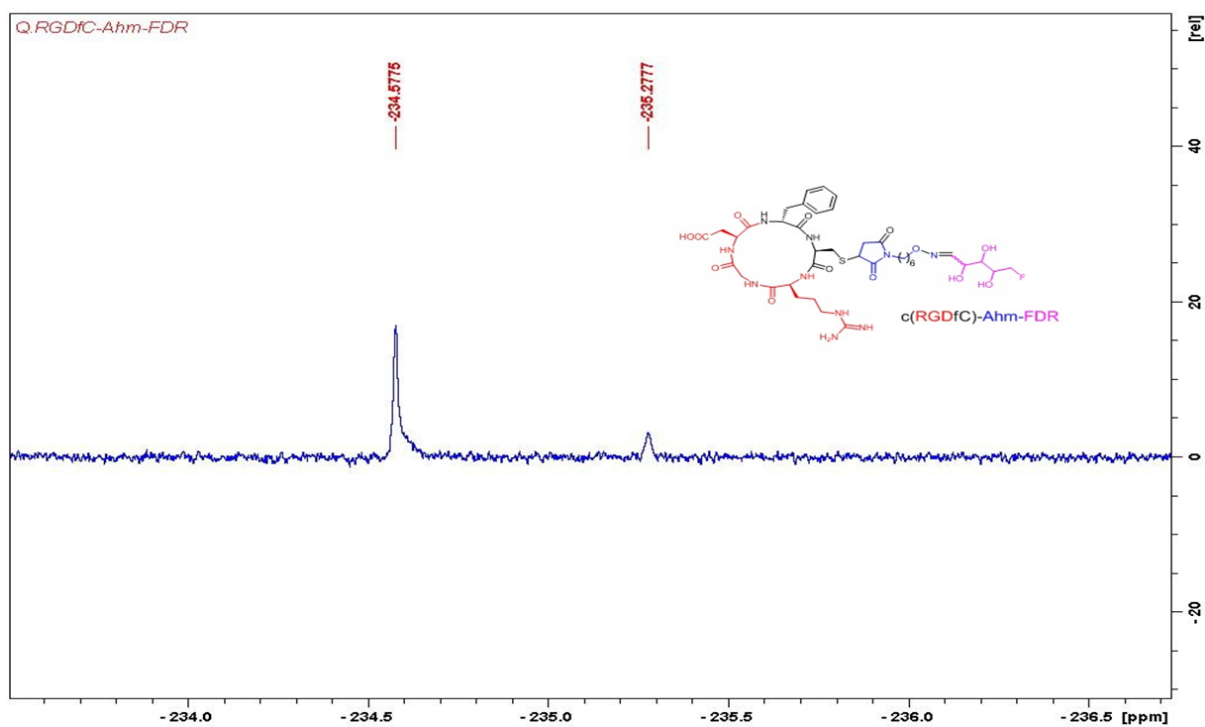

Figure S10  $^1\text{H}$  NMR of c(RGDfK)-Aoa-FDR in  $\text{D}_2\text{O}$

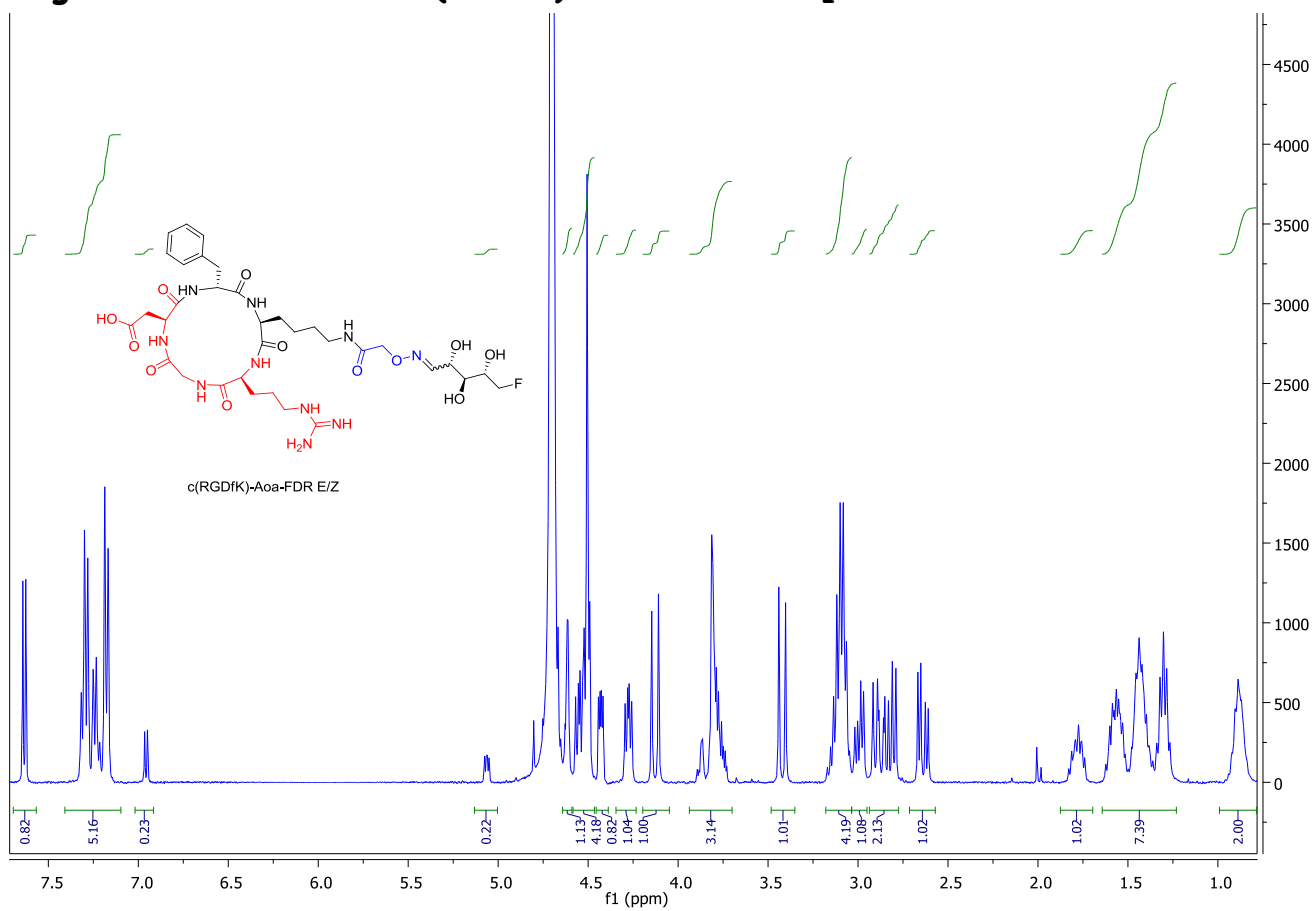



Figure S11  $^{13}\text{C}$  NMR of c(RGDfK)-Aoa-FDR in  $\text{D}_2\text{O}$

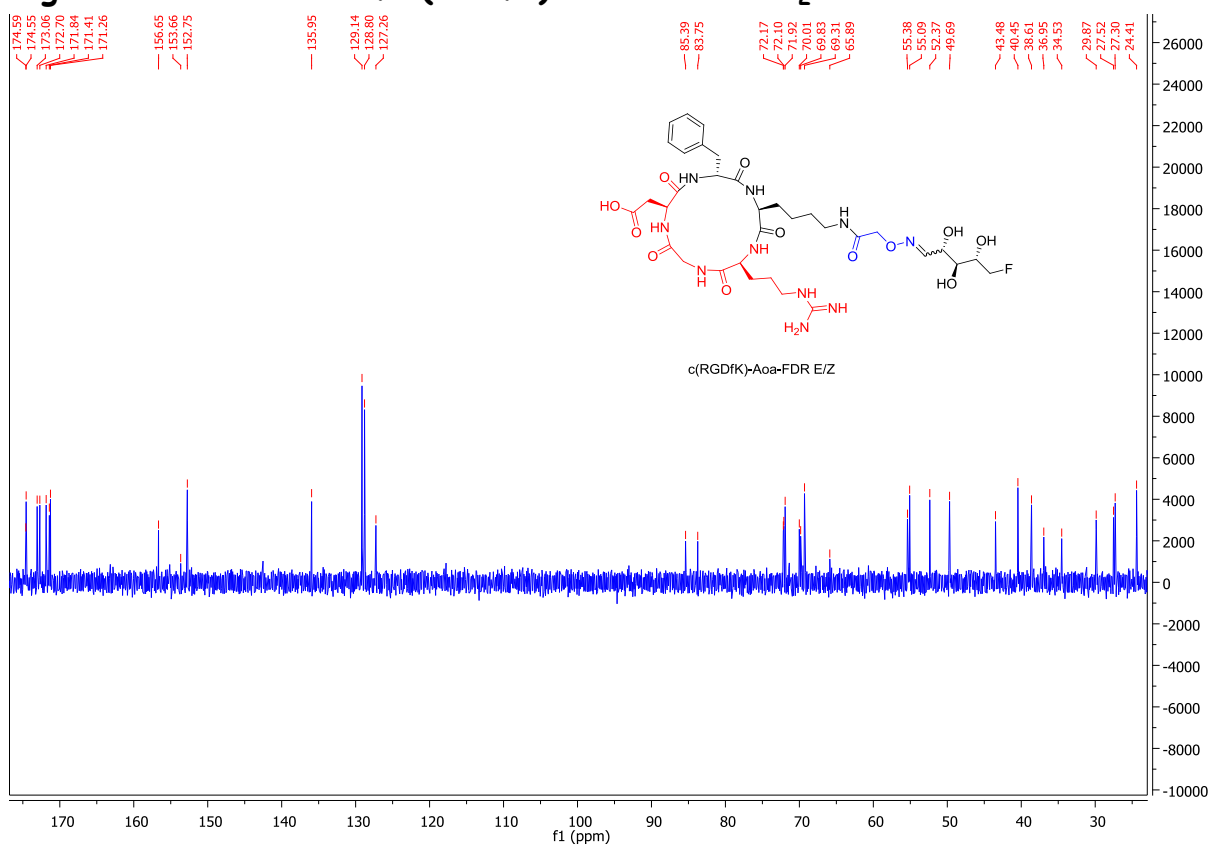

Figure S12  $^{19}\text{F}$  NMR of c(RGDfK)-Aoa-FDR in  $\text{D}_2\text{O}$

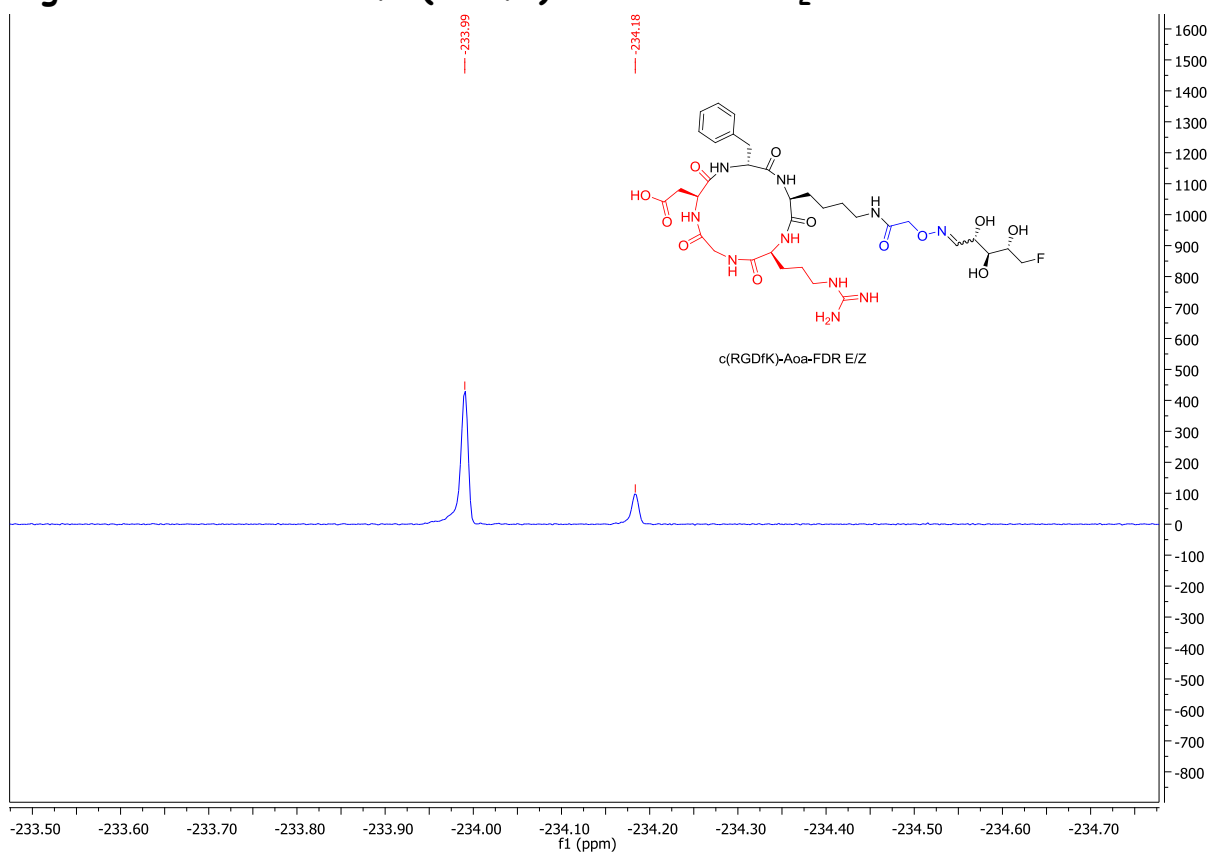

Supplement: c3ob40550h.pdf [file c3ob40550h.pdf]
